# Supplementary material for: Convenience Food Options and Adequacy of Nutrient Intake among School Children during the COVID-19 Pandemic
Source: MDPI journal article supplement (doi:10.3390/nu14030630), 2022-01-31
Supplement: s1 [file s1]

**Table S1.** Crude and multinomial regressions for significant SES determinants and literacy scores.

|                                 |                                             | Relative Risk (CI 95%) |                   |                 |                    |
|---------------------------------|---------------------------------------------|------------------------|-------------------|-----------------|--------------------|
|                                 |                                             | Adequate               | Excess            | Deficient       | Inadequate         |
|                                 |                                             | e                      |                   |                 |                    |
| Instant Food ( <i>n</i> = 666)  | Crude (excluding missing income)            | 1.00                   | 2.3 (1.3, 4.2) ** | 2.7 (0.7, 11.1) | 3.0 (1.6, 5.6) **  |
|                                 | Crude (all sample)                          | 1.00                   | 2.5 (1.4, 4.4) ** | 2.7 (0.7, 10.7) | 3.4 (1.9, 6.2) *** |
|                                 | Model 2 (gender + grade + family size)      | 1.00                   | 2.6 (1.5, 4.6) ** | 3.2 (0.8, 13.0) | 3.3 (1.8, 6.1) *** |
|                                 | Model 3 (gender + grade + income)           | 1.00                   | 2.2 (1.2, 4.0) ** | 3.0 (0.7, 12.5) | 2.4 (1.2, 4.5) **  |
|                                 | Model 4 (gender + grade + father education) | 1.00                   | 2.6 (1.5, 4.6) ** | 3.4 (0.8, 14.4) | 3.0 (1.6, 5.6) **  |
|                                 | Model 5 (gender + grade + mother education) | 1.00                   | 2.5 (1.4, 4.3) ** | 2.8 (0.7, 11.2) | 3.1 (1.7, 5.7) *** |
|                                 | Model 6 (gender + grade + skill)            | 1.00                   | 2.2 (1.3, 3.9) ** | 2.7 (0.7, 11.1) | 2.4 (1.3, 4.5) **  |
|                                 | Model 7 (gender + grade + attitude)         | 1.00                   | 2.4 (1.4, 4.2) ** | 2.8 (0.7, 11.4) | 2.6 (1.4, 4.9) **  |
| Frozen Food ( <i>n</i> = 660)   | Crude (excluding missing income)            | 1.00                   | 1.3 (0.9, 2.0)    | 1.6 (0.5, 5.4)  | 1.4 (0.8, 2.2)     |
|                                 | Crude (all sample)                          | 1.00                   | 1.3 (0.9, 1.9)    | 1.4 (0.5, 4.6)  | 1.4 (0.9, 2.2)     |
|                                 | Model 2 (gender + grade + family size)      | 1.00                   | 1.3 (0.9, 2.0)    | 1.4 (0.4, 4.5)  | 1.3 (0.9, 2.1)     |
|                                 | Model 3 (gender + grade + income)           | 1.00                   | 1.3 (0.9, 2.0)    | 1.6 (0.5, 5.5)  | 1.4 (0.8, 2.2)     |
|                                 | Model 4 (gender + grade + father education) | 1.00                   | 1.3 (0.9, 2.0)    | 1.6 (0.5, 5.4)  | 1.5 (0.9, 2.4)     |
|                                 | Model 5 (gender + grade + mother education) | 1.00                   | 1.3 (0.9, 1.9)    | 1.4 (0.4, 4.6)  | 1.4 (0.9, 2.2)     |
|                                 | Model 6 (gender + grade + skill)            | 1.00                   | 1.2 (0.8, 1.8)    | 1.2 (0.4, 4.1)  | 1.1 (0.7, 1.8)     |
|                                 | Model 7 (gender + grade + attitude)         | 1.00                   | 1.2 (0.8, 1.8)    | 1.3 (0.4, 4.2)  | 1.3 (0.8, 2.1)     |
| Take-Out Food ( <i>n</i> = 663) | Crude (excluding missing income)            | 1.00                   | 1.2 (0.8, 1.8)    | 0.7 (0.2, 2.7)  | 2.1 (1.3, 3.3) **  |
|                                 | Crude (all sample)                          | 1.00                   | 1.2 (0.8, 1.7)    | 0.6 (0.2, 2.4)  | 2.0 (1.3, 3.1) **  |
|                                 | Model 2 (gender + grade + family size)      | 1.00                   | 1.2 (0.8, 1.7)    | 0.6 (0.2, 2.4)  | 2.0 (1.3, 3.1) **  |
|                                 | Model 3 (gender + grade + income)           | 1.00                   | 1.2 (0.8, 1.8)    | 0.7 (0.2, 2.7)  | 1.8 (1.1, 2.9) *   |
|                                 | Model 4 (gender + grade + father education) | 1.00                   | 1.1 (0.8, 1.7)    | 0.7 (0.2, 2.6)  | 1.9 (1.2, 2.9) **  |
|                                 | Model 5 (gender + grade + mother education) | 1.00                   | 1.2 (0.8, 1.7)    | 0.5 (0.1, 2.1)  | 1.8 (1.2, 2.8) **  |
|                                 | Model 6 (gender + grade + skill)            | 1.00                   | 1.1 (0.7, 1.6)    | 0.6 (0.2, 2.2)  | 1.6 (1.0, 2.6) *   |
|                                 | Model 7 (gender + grade + attitude)         | 1.00                   | 1.1 (0.8, 1.6)    | 0.6 (0.1, 2.2)  | 1.6 (1.0, 2.6) *   |

<sup>1</sup> \* *p* < 0.05, \*\* *p* < 0.01, \*\*\* *p* < 0.001.

**Table S2.** Associations between convenience food intake and missing income data.

|                                          |                     | Relative Risk (CI 95%) |           |             |             | <i>p</i> -Value |
|------------------------------------------|---------------------|------------------------|-----------|-------------|-------------|-----------------|
|                                          |                     | Adequate               | Excess    | Deficient   | Inadequate  |                 |
| Among those with data for instant foods  | With income data    | 157 (27.4%)            | 12 (2.1%) | 266 (46.3%) | 139 (24.2%) | 0.8492          |
|                                          | Without income data | 23 (25.0%)             | 1 (1.1%)  | 46 (50.0%)  | 22 (23.9%)  |                 |
| Among those with data for frozen foods   | With income data    | 154 (27.1%)            | 12 (2.1%) | 264 (46.4%) | 139 (24.4%) | 0.8829          |
|                                          | Without income data | 23 (25.3%)             | 1 (1.1%)  | 45 (49.5%)  | 22 (24.4%)  |                 |
| Among those with data for take-out foods | With income data    | 157 (27.5%)            | 11 (1.9%) | 264 (46.2%) | 139 (24.3%) | 0.8646          |
|                                          | Without income data | 23 (25.0%)             | 1 (1.1%)  | 46 (50.0%)  | 22 (23.9%)  |                 |
| Among all people with nutrient data      | With income data    | 158 (27.4%)            | 12 (2.1%) | 268 (46.4%) | 139 (24.1%) | 0.8237          |
|                                          | Without income data | 23 (24.5%)             | 1 (1.1%)  | 47 (50.0%)  | 23 (24.5%)  |                 |
